# Supplementary material for: Examining the External Antecedents of Innovative Work Behavior: The Role of Government Support for Talent Policy
Source: PubMed Central journal article supplement (PMC7908344; doi:10.3390/ijerph18031213), 2021-01-29
Supplement: ijerph-18-01213-s001.pdf [file ijerph-18-01213-s001.pdf]

**Supplementary Material Table S1.**

**Table S1.** The constructs, item content, std. factor loadings, and Cronbach's  $\alpha$  values.

| Constructs | Measures | Item Content                                                                                            | Std. Loading | Cronbach's $\alpha$ |
|------------|----------|---------------------------------------------------------------------------------------------------------|--------------|---------------------|
| GSTP       | GSTP1    | Our company really benefits from the help of GSTP in recruiting and keeping talents.                    | 0.715        | 0.785               |
|            | GSTP2    | Our company really benefits from the help of GSTP in the training of our employees.                     | 0.676        |                     |
|            | GSTP3    | Our company really benefits from the help of GSTP in motivating talents (compensation for performance). | 0.702        |                     |
|            | GSTP4    | Our company does benefit from the GSTP in encouraging the talents to innovate.                          | 0.680        |                     |
| ATT        | ATT1     | I actively seek innovative ideas and approaches in my work.                                             | 0.787        | 0.747               |
|            | ATT2     | I try to assist other members in developing new ideas and approaches.                                   | 0.695        |                     |
|            | ATT3     | I am willing to venture into new ideas and approaches to accomplish my work.                            | 0.647        |                     |
| SN         | SN1      | I think my supervisors want me to be creative in my work.                                               | 0.695        | 0.781               |
|            | SN2      | I think my colleagues would like the new ideas and approaches that I propose at work.                   | 0.932        |                     |
|            | SN3      | I think my work team needs me to come up with new ideas and approaches.                                 | 0.604        |                     |
| PC         | PC1      | When I am faced with the difficult task, I believe I will accomplish the work creatively.               | 0.700        | 0.815               |
|            | PC2      | I believe I have the knowledge, resources, and ability to creatively accomplish work tasks.             | 0.808        |                     |
|            | PC3      | I believe I can control whether I adopt new ideas and new approaches to accomplish tasks.               | 0.754        |                     |
|            | PC4      | I am a strong learner and can quickly absorb new knowledge and skills related to my work tasks.         | 0.640        |                     |
| II         | II1      | I have a strong motivation to propose new and constructive working proposals.                           | 0.660        | 0.734               |
|            | II2      | At work, I am willing to actively seek new ideas or solutions to solve problems.                        | 0.822        |                     |
|            | II3      | I am willing to proactively share my new ideas or solutions to problems with colleagues.                | 0.614        |                     |
| IWB        | IWB1     | I seek newer approaches, techniques or tools to work.                                                   | 0.629        | 0.845               |
|            | IWB2     | I provide original solutions to problems.                                                               | 0.673        |                     |
|            | IWB3     | I mobilize people around me to support my work ideas.                                                   | 0.739        |                     |
|            | IWB4     | I make key organizational members to be enthusiastic about my work ideas.                               | 0.616        |                     |
|            | IWB5     | I put innovative ideas into practice and turn them into useful applications or solutions.               | 0.665        |                     |
|            | IWB6     | I introduce innovative ideas into the work environment in a relatively systematic way.                  | 0.654        |                     |
|            | IWB7     | I evaluate the realistic usefulness of my innovative ideas.                                             | 0.672        |                     |

**Note:** GSTP: Government support for talent policy. ATT: Innovative attitude. SN: Subjective norm. PBC: Perceived behavior control. II: Innovative intention. IWB: Innovative work behavior.

## Supplementary material Table S2.

**Table 2.** Descriptive statistics of the respondents.

| Item                   | Content                               | Percent   | Item        | Content                 | Percent |
|------------------------|---------------------------------------|-----------|-------------|-------------------------|---------|
| SEX                    | Male                                  | 41.45%    | EXP         | 0–5 years               | 26.97%  |
|                        | Female                                | 58.55%    |             | 6–10 years              | 28.95%  |
| IND                    | Other                                 | 15.79%    | YEAR        | 11–15 years             | 27.63%  |
|                        | Electronic information technology     | 21.05%    |             | 16–20 years             | 9.21%   |
|                        | Biology and Medicine                  | 14.47%    |             | ≥20 years               | 7.24%   |
|                        | New materials and new energy          | 10.53%    | 0–5 years   | 22.37%                  |         |
|                        | High-tech service                     | 10.53%    | 6–10 years  | 34.21%                  |         |
|                        | Resource and environmental technology | 11.84%    | 11–15 years | 26.32%                  |         |
|                        | Aerospace industry                    | 1.32%     | 16–20 years | 9.21%                   |         |
| Advanced manufacturing | 14.47%                                | ≥20 years | 7.89%       |                         |         |
| POS                    | HRM supervisor                        | 31.58%    | REV         | <0.01 billion yuan      | 27.63%  |
|                        | HRM manager                           | 33.55%    |             | 0.01–0.019 billion yuan | 21.71%  |
|                        | Other department manager              | 5.26%     |             | 0.02–0.099 billion yuan | 25.00%  |
|                        | Senior executive                      | 13.16%    |             | 0.10–0.39 billion yuan  | 15.79%  |
|                        | Other                                 | 16.45%    |             | ≥0.40 billion yuan      | 9.87%   |
| OLD                    | ≤25 years old                         | 11.84%    | PEO         | <100 people             | 45.39%  |
|                        | 26–35 years old                       | 44.74%    |             | 100–299 people          | 31.58%  |
|                        | 36–45 years old                       | 30.26%    |             | 300–499 people          | 14.47%  |
|                        | 46–55 years old                       | 12.50%    |             | 500–999 people          | 5.26%   |
|                        | >55 years old                         | 0.66%     |             | ≥1000 people            | 3.29%   |
| EDU                    | Under college                         | 1.32%     |             |                         |         |
|                        | College degree                        | 17.76%    |             |                         |         |
|                        | Bachelor degree                       | 71.05%    |             |                         |         |
|                        | Master degree and above               | 9.87%     |             |                         |         |

Note:  $n = 152$ . SEX: Sex of Respondents. IND: Industries. POS: Position. OLD: Age of respondents. EDU: Education level. EXP: Working Experience. YEAR: Age of the company. REV: Operating revenue. PEO: Number of people.

## Supplementary Material 3.

We test the robustness of the results by adding control variables and changing the independent variables. We test the robustness of the results by adding control variables and changing the independent variables. The issue of omitted variables is of most concern. HRM practitioners may be more likely to develop IWB in enterprises that are highly innovative. but the innovative capability is not directly observed. Since we invited only one HRM practitioner for a company in principle. We therefore considered adding firm-level control variables while changing the GSTP to a 0–1 dummy variable ( $D_{gstp} = 0$ , if GSTP value  $\leq 16$ ). As companies age, organizations rely on their original development paths to develop organizational inertia [1], which can hinder the absorption of new knowledge and limit innovation [2]. Regarding organizational size, large corporations have greater R&D capabilities and risk tolerance than small firms. Large corporations are also considered to have a greater absorptive capacity [3], but may also lack the flexibility to acquire and assimilate new external knowledge [2]. Based on the above studies, we selected revenue, number of employees, firm age, and the industry as firm-level control variables to proxy for unobserved variables such as possible innovative capacity. The regression results are shown in Table S3, the first column adds firm-level control variables, and in the second column we add a dummy variable of  $D_{gstp}$ , which is significant at the 10% level. HRM practitioners who obtained the GSTP were 1.550 times the odds of attempting IWB than those who did not. In the third column, we consume more degrees of freedom by adding the industry variable. Although  $D_{gstp}$  becomes insignificant ( $p = 0.109$ ), it is very close to the 10% level of significance. Thus, it is reasonable to assume that the effect of GSTP on IWB is generally robust.

**Table S3.** The results of robustness tests.

| Variables | IWB                    |                        |                        |
|-----------|------------------------|------------------------|------------------------|
|           | Model 1                | Model 2                | Model 3                |
| sex       | 0.178<br>(0.265)       | 0.411<br>(0.605)       | 0.180<br>(0.263)       |
| old       | -0.233<br>(-0.403)     | -0.260<br>(-0.453)     | -0.509<br>(-0.869)     |
| edu       | 1.080 *<br>(1.877)     | 1.014 *<br>(1.770)     | 0.938<br>(1.613)       |
| exp       | 0.461<br>(1.061)       | 0.567<br>(1.299)       | 0.609<br>(1.369)       |
| rev       | 0.748 **<br>(2.183)    | 0.687 **<br>(2.007)    | 0.773 **<br>(2.215)    |
| peo       | -0.185<br>(-0.434)     | -0.243<br>(-0.573)     | -0.396<br>(-0.891)     |
| year      | -0.400<br>(-1.192)     | -0.393<br>(-1.179)     | -0.146<br>(-0.404)     |
| D.gstp    |                        | 1.550 *<br>(1.691)     | 1.534<br>(1.614)       |
| 1.ind     |                        |                        | 1.911 *<br>(1.789)     |
| 2.ind     |                        |                        | 0.486<br>(0.412)       |
| 3.ind     |                        |                        | 0.672<br>(0.513)       |
| 4.ind     |                        |                        | 0.382<br>(0.298)       |
| 5.ind     |                        |                        | 2.158<br>(1.653)       |
| 6.ind     |                        |                        | -2.231<br>(-0.774)     |
| 7.ind     |                        |                        | -0.576<br>(-0.487)     |
| _cons     | 32.007 ***<br>(14.123) | 30.819 ***<br>(13.065) | 30.431 ***<br>(12.241) |
| N         | 152                    | 152                    | 152                    |
| Adj. R-sq | 0.024                  | 0.036                  | 0.050                  |

Note: t statistics in parentheses. \*  $p < 0.1$ , \*\*  $p < 0.05$ , \*\*\*  $p < 0.01$ .

## References

1. Xie, Z.; Li, J. Exporting and innovating among emerging market firms: The moderating role of institutional development. *J. Int. Bus. Stud.* **2018**, *49*, 222–245.
2. Duan, Y.; Wang, W.; Zhou, W. The multiple mediation effect of absorptive capacity on the organizational slack and innovation performance of high-tech manufacturing firms: Evidence from Chinese firms. *Int. J. Prod. Econ.* **2020**, 107754.
3. Kulkarni, S.S. A framework and model for absorptive capacity in a dynamic multi-firm environment. *Int. J. Prod. Econ.* **2015**, *167*, 50–62.
